# Supplementary material for: Novel RGO–ZnWO4–Fe3O4 nanocomposite as high performance visible light photocatalyst
Source: Royal Society of Chemistry journal article supplement (doi:10.1039/c6ra13002j), 2016-01-01
Supplement: c6ra13002j1.pdf [file c6ra13002j1.pdf]

## Supporting Information

### Novel RGO/ZnWO<sub>4</sub>/Fe<sub>3</sub>O<sub>4</sub> nanocomposite as high performance visible light photocatalyst

M. Mohamed Jaffer Sadiq<sup>a</sup>, Sandhya Shenoy U<sup>b</sup> and D. Krishna Bhat<sup>a\*</sup>

<sup>a</sup>Department of Chemistry, National Institute of Technology Karnataka Surathkal, Mangalore - 575025, India.

<sup>b</sup>Jawaharlal Nehru Centre for Advanced Scientific Research, Jakkur, Bangalore - 560064, India.

\*Corresponding author, Email: denthajekb@gmail.com

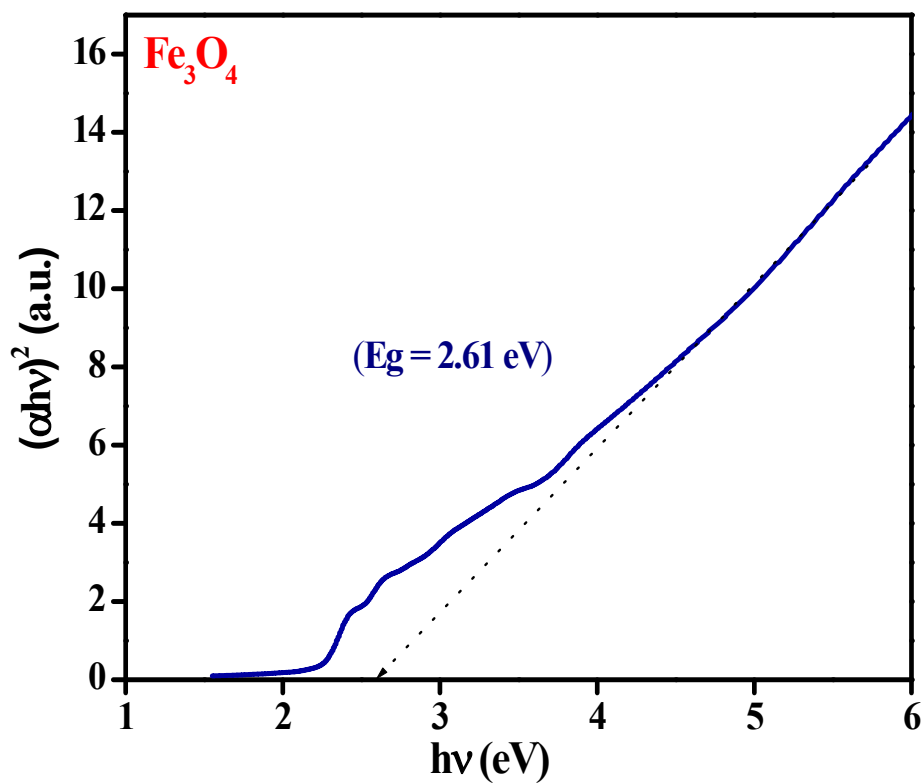

Fig. S1. Band gap plot of pure  $\text{Fe}_3\text{O}_4$ .

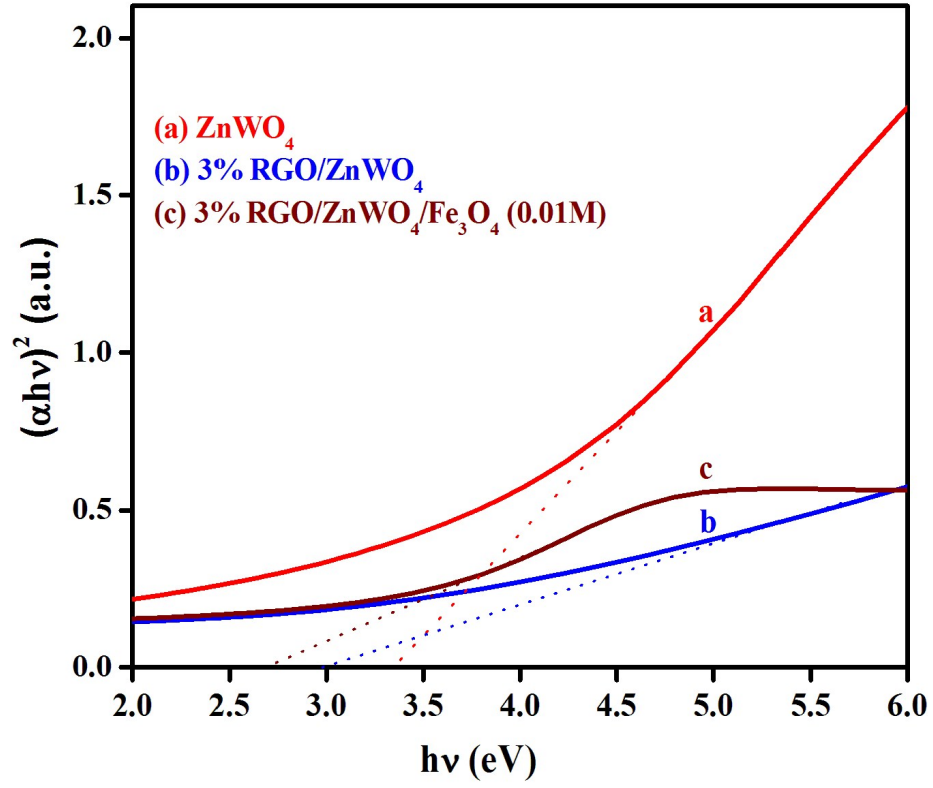

Fig. S2. Band gap plots for (a)  $ZnWO_4$ , (b) RGO/ $ZnWO_4$  and (c) RGO/ $ZnWO_4/Fe_3O_4$ .
